# Supplementary material for: Protective Immunity of COVID-19 Vaccination with ChAdOx1 nCoV-19 Following Previous SARS-CoV-2 Infection: A Humoral and Cellular Investigation
Source: MDPI journal article supplement (doi:10.3390/v14091916), 2022-08-30
Supplement: s1 [file s1]

## Supplementary Materials

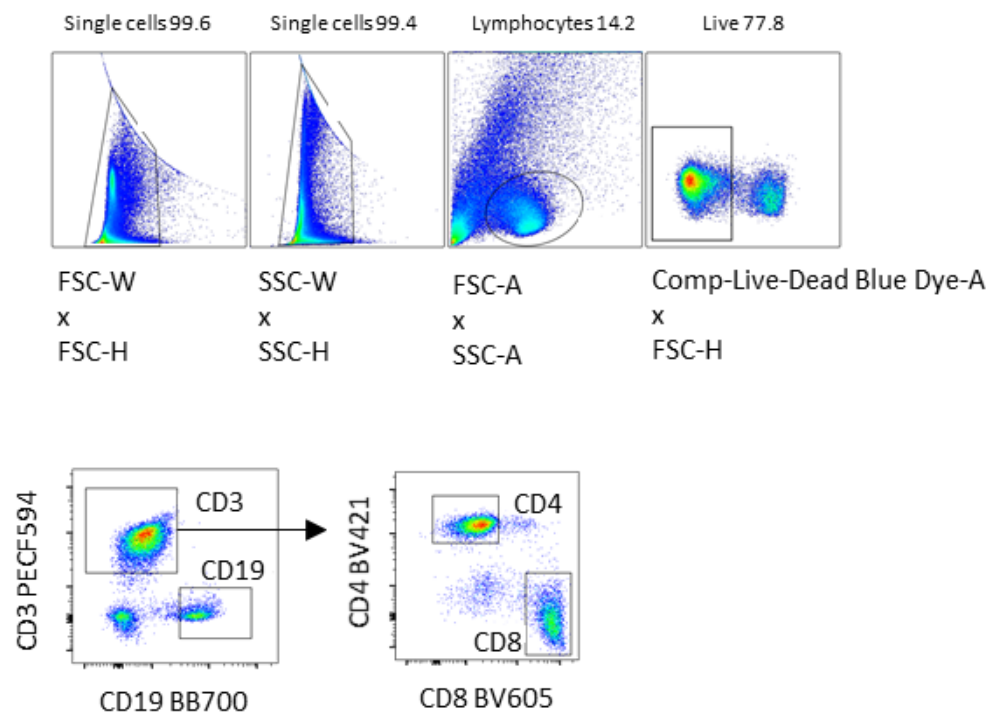

**Supplementary Figure S1.** Immunophenotype gating strategy for B and T memory cells.

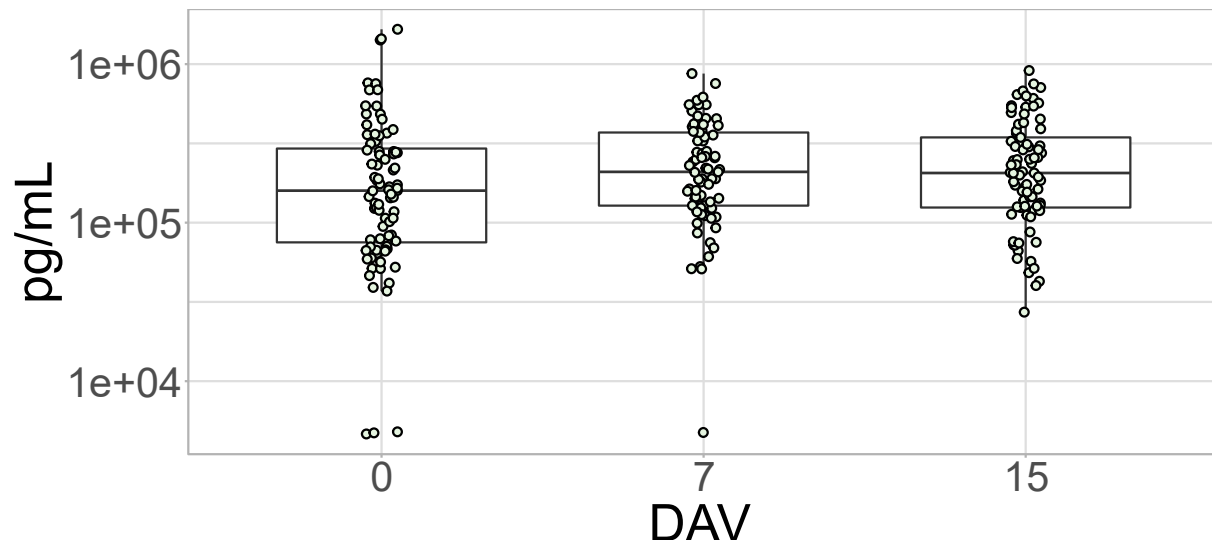

**Supplementary Figure S2.** Follow-up D-Dimer plasma quantitation after ChAdOx1 nCoV-19 vaccination analyzed at 0,7 and 15 DAV. Volunteers immunized with prime-boost protocols with ChAdOx1 nCoV-19 on days 0 and 90 respectively. Data represented in boxes with mean and interquartile interval of D-Dimer plasma quantitation in pg/mL. Comparisons between timepoints using Kruskal-Wallis with Dunn's multiple comparison post-test. Sample number varying according to follow-up segment loss. DAV = Days After Vaccination.

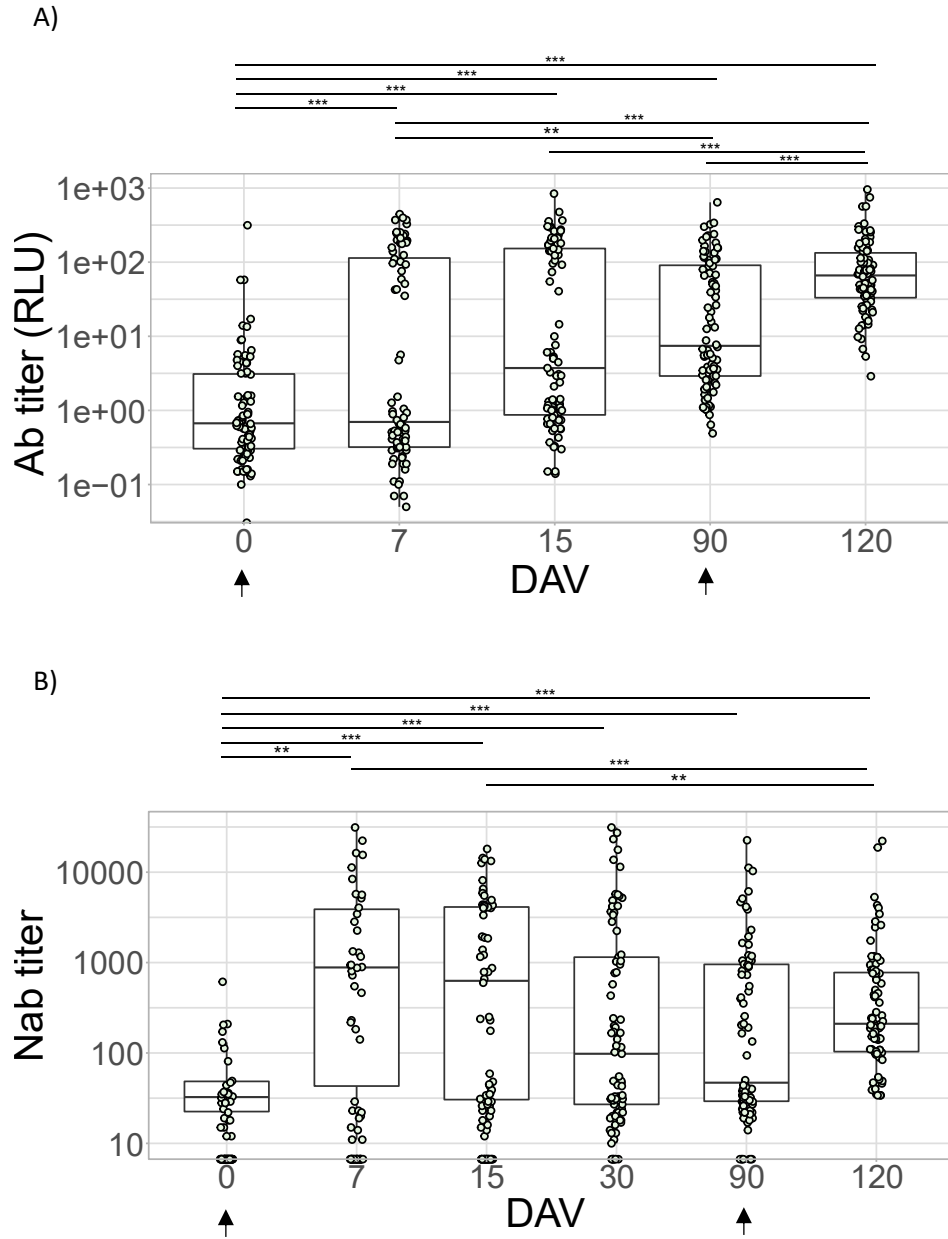

**Supplementary Figure S3.** Follow-up humoral analysis after ChAdOx1 nCoV-19 vaccination analyzed at 0, 7, 15, 90 and 120 DAV. Volunteers immunized with prime-boost protocols with ChAdOx1 nCoV-19 on days 0 and 90 respectively (indicated by arrows). Data represented in boxes with mean and interquartile interval of (A) total IgG anti-RBD and (B) Nabs. Total IgG anti-RBD (RBD region-Spike protein of SARS-CoV-2 an ACE-2 receptor ligand) ELISA expressed by RLU (Relative Light Units). Nabs titer quantified by PRNT<sub>50%</sub>. Comparisons between timepoints using Kruskal-Wallis with Dunn's multiple comparison post-test. Considering \* $p < 0.05$ , \*\* $p < 0.01$ , and \*\*\* $p < 0.001$ . Sample number varying according to follow-up segment loss. DAV = Days After Vaccination. Nabs=Neutralizing antibodies.

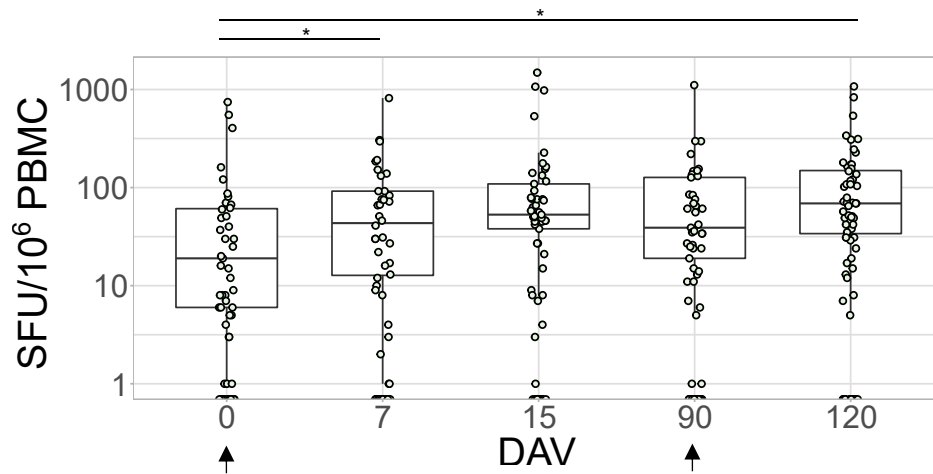

**Supplementary Figure S4.** Follow-up IFN- $\gamma$  secretion quantitation after ChAdOx1 nCoV-19 vaccination analyzed at 0, 7, 15, 90 and 120 DAV. Volunteers immunized with prime-boost protocols with ChAdOx1 nCoV-19 on days 0 and 90 respectively (indicated by arrows). Data represented in boxes with mean and interquartile interval of D-Dimer plasma quantitation in pg/mL. Comparisons between timepoints using Kruskal-Wallis with Dunn's multiple comparison post-test. Considering \* $p < 0.05$ , \*\* $p < 0.01$ , and \*\*\* $p < 0.001$ . Sample number varying according to follow-up segment loss. DAV = Days After Vaccination.
